# Supplementary material for: Importance of medical data preprocessing in predictive modeling and risk factor discovery for the frailty syndrome
Source: Springer Nature journal article supplement (doi:10.1186/s12911-019-0747-6), 2019-02-18
Supplement: MOESM1 [file 16488802]

# Additional File 1

## A.1 Tables

| Attribute name    | Values expected | Description                                      | Type        | How and when was it recorded? |
|-------------------|-----------------|--------------------------------------------------|-------------|-------------------------------|
| ppeso             | 0,1             | Fried criterium: weight loss >10 lbs. in past yr | categorical | calculated by hospital 2008   |
| exhaustion        | 0,1             | Fried criterium: exhaustion >=3days in past week | categorical | calculated by hospital 2008   |
| pasefrag          | 0,1             | Fried criterium: PASE <=20 percentile            | categorical | calculated by hospital 2008   |
| marchafragil      | 0,1             | Fried criterium: time to walk >=80th percentile  | categorical | calculated by hospital 2008   |
| fuerzafragil      | 0,1             | Fried criterium: grip strength <=20th percentile | categorical | calculated by hospital 2008   |
| fragil            | 0,1,2           | Frail status according to <i>Fried</i> scale     | categorical | calculated by hospital 2008   |
| ppeso_2013        | 0,1             | Fried criterium: weight loss >10 lbs. in past yr | categorical | calculated by hospital 2013   |
| exhaustion_2013   | 0,1             | Fried criterium: exhaustion >=3days in past week | categorical | calculated by hospital 2013   |
| pasefrag_2013     | 0,1             | Fried criterium: PASE <=20 percentile            | categorical | calculated by hospital 2013   |
| marchafragil_2013 | 0,1             | Fried criterium: time to walk >=80th percentile  | categorical | calculated by hospital 2013   |
| fuerzafragil_2013 | 0,1             | Fried criterium: grip strength <=20th percentile | categorical | calculated by hospital 2013   |
| fragil2013        | 0,1,2           | Frail status according to <i>Fried</i> scale     | categorical | calculated by hospital 2013   |

**Table A.1:** Features from the data set related to the *Fried* questions for determining the frailty status.

| Attribute name | Values expected | Description                                                                     | Type    | How and when was it recorded?          |
|----------------|-----------------|---------------------------------------------------------------------------------|---------|----------------------------------------|
| ys1            | yes, no         | GDS1:Are you basically satisfied with your life?                                | binary  | questionnaire answered by patient 2008 |
| ys2            | yes, no         | GDS2:Have you dropped many of your activities and interests?                    | binary  | questionnaire answered by patient 2008 |
| ys3            | yes, no         | GDS3:Do you feel that your life is empty?                                       | binary  | questionnaire answered by patient 2008 |
| ys4            | yes, no         | GDS4:Do you often get bored?                                                    | binary  | questionnaire answered by patient 2008 |
| ys5            | yes, no         | GDS5:Are you in good spirits most of the time?                                  | binary  | questionnaire answered by patient 2008 |
| ys6            | yes, no         | GDS6:Are you afraid that something bad is going to happen to you?               | binary  | questionnaire answered by patient 2008 |
| ys7            | yes, no         | GDS7:Do you feel happy most of the time?                                        | binary  | questionnaire answered by patient 2008 |
| ys8            | yes, no         | GDS8:Do you often feel helpless?                                                | binary  | questionnaire answered by patient 2008 |
| ys9            | yes, no         | GDS9:Do you prefer to stay at home, rather than going out and doing new things? | binary  | questionnaire answered by patient 2008 |
| ys10           | yes, no         | GDS10:Do you feel you have more problems with memory than most?                 | binary  | questionnaire answered by patient 2008 |
| ys11           | yes, no         | GDS11:Do you think it is wonderful to be alive now?                             | binary  | questionnaire answered by patient 2008 |
| ys12           | yes, no         | GDS12:Do you feel pretty worthless the way you are now?                         | binary  | questionnaire answered by patient 2008 |
| ys13           | yes, no         | GDS13:Do you feel full of energy?                                               | binary  | questionnaire answered by patient 2008 |
| ys14           | yes, no         | GDS14:Do you feel that your situation is hopeless?                              | binary  | questionnaire answered by patient 2008 |
| ys15           | yes, no         | GDS15:Do you think that most people are better off than you are?                | binary  | questionnaire answered by patient 2008 |
| gdstotal       | 0-15            | GDS: Total Score                                                                | numeric | calculated by hospital 2008            |
| depression     | yes,no          | gdstotal>=5                                                                     | binary  | calculated by hospital 2008            |

**Table A.2:** Features from the data set related to the Geriatric Depression Scale (*GDS*) questionnaire.

| Attribute name        | Values expected | Description                                                                                                     | Type        | How and when was it recorded? |
|-----------------------|-----------------|-----------------------------------------------------------------------------------------------------------------|-------------|-------------------------------|
| drug_n_comercial_name | Name            | Drug <i>n</i> commercial name                                                                                   | text        | hospital 2008                 |
| drug_n_pa             | Drug name       | Drug <i>n</i> Active drug                                                                                       | text        | hospital 2008                 |
| drug_n_atc            | Code            | Drug <i>n</i> ATC code                                                                                          | text        | hospital 2008                 |
| drug_na               | 1,2,3,NAN       | How do you take it? 1. continuous; 2. intermittent; 3. Sporadic; other NAN                                      | categorical | hospital 2008                 |
| drug_nb               | 1,2,3,NAN       | When did you start to take it? 1. less than 1 month; 2. from 1 month to 1 year; 3. more than 1 year; other. NAN | categorical | hospital 2008                 |

**Table A.3:** Medication related features from the data set: there are 11 ( $n = \{1...11\}$ ) different drug attribute sets. All have the same format as in this table.

| Attribute name | Values expected | Description                                              | Type    | How and when was it recorded? | Metabolic system    |
|----------------|-----------------|----------------------------------------------------------|---------|-------------------------------|---------------------|
| p1leu          | 4.5-11          | Leucocytes [x10 <sup>9</sup> /L]                         | numeric | laboratory 2008               | immune              |
| p2hema         | 4-5             | Erythrocytes [x10 <sup>12</sup> /L]                      | numeric | laboratory 2008               | erythrocytes        |
| p3hgb          | 12-15           | Hemoglobyn [g/dL]                                        | numeric | laboratory 2008               | erythrocytes        |
| p4hct          | 37-47           | Hematocrit [%]                                           | numeric | laboratory 2008               | erythrocytes        |
| p5vcm          | 80-99           | Mean Corpuscular Volume (MCV) [fL]                       | numeric | laboratory 2008               | erythrocytes        |
| p6hcm          | 27-31           | Mean Corpuscular Haemoglobin (MCH) [pg]                  | numeric | laboratory 2008               | erythrocytes        |
| p7chem         | 33-37           | Mean Corpuscular Haemoglobin Concentration (CHCM) [g/dL] | numeric | laboratory 2008               | erythrocytes        |
| p8ade          | 11.5-14.5       | Red Cell Distribution Width (RDW) [%]                    | numeric | laboratory 2008               | erythrocytes        |
| p9lin          | 1-5             | Lymphocytes [x10 <sup>9</sup> /L]                        | numeric | laboratory 2008               | immune              |
| p10mono        | 0.4-1.3         | Monocytes [x10 <sup>9</sup> /L]                          | numeric | laboratory 2008               | immune              |
| p13eos         | 0.02-0.6        | Eosinophiles [x10 <sup>9</sup> /L]                       | numeric | laboratory 2008               | immune              |
| p14baso        | 0-0.2           | Basophiles [x10 <sup>9</sup> /L]                         | numeric | laboratory 2008               | immune              |
| p15dd          | <500            | D Dimer [ $\mu$ g/L]                                     | numeric | laboratory 2008               | coagulation         |
| p16plaq        | 120-400         | Platelets [x10 <sup>9</sup> /L]                          | numeric | laboratory 2008               | coagulation         |
| p17vpm         | 7-12            | Mean Platelet Volume (MPV) [fl]                          | numeric | laboratory 2008               | coagulation         |
| p23glu         | 60-100          | Glucose [mg/dL]                                          | numeric | laboratory 2008               | sugars              |
| p24urea        | 10-71           | Urea [mg/dL]                                             | numeric | laboratory 2008               | nephritic           |
| p25acur        | 2.4-5.7         | Uric acid [mg/dL]                                        | numeric | laboratory 2008               | nephritic           |
| p26crea        | 0.5-0.9         | Creatinine [mg/dL]                                       | numeric | laboratory 2008               | nephritic           |
| p27prot        | 6.4-8.3         | Protein [g/dL]                                           | numeric | laboratory 2008               | proteins            |
| p28albu        | 3.4-4.8         | Albumin [g/dL]                                           | numeric | laboratory 2008               | proteins            |
| p30chol        | 110-230         | Cholesterin [mg/dL]                                      | numeric | laboratory 2008               | fats                |
| p31trig        | 60-200          | Triglycerides [mg/dL]                                    | numeric | laboratory 2008               | fats                |
| p32ca          | 8.4-10.2        | Calcium (Ca) [mg/dL]                                     | numeric | laboratory 2008               | minerals            |
| p33p           | 2.7-4.5         | Phosphorus (P) [mg/dL]                                   | numeric | laboratory 2008               | minerals            |
| p34na          | 132-146         | Sodium (Na) [mEq/L]                                      | numeric | laboratory 2008               | minerals            |
| p35k           | 3.7-5.4         | Potassium (K) [mEq/L]                                    | numeric | laboratory 2008               | minerals            |
| p36cl          | 94-110          | Chloride (Cl) [mEq/L]                                    | numeric | laboratory 2008               | minerals            |
| p37got         | 5-37            | Glutamic-Oxaloacetic Transaminase (GOT) [U/L]            | numeric | laboratory 2008               | hepatic             |
| p38gpt         | 5-40            | Glutamic-Pyruvic Transaminase (GPT) [U/L]                | numeric | laboratory 2008               | hepatic             |
| p39ggt         | 5-39            | Gamma-Glutamyl Transferase (GGT) [U/L]                   | numeric | laboratory 2008               | hepatic             |
| p40falc        | 35-104          | Alkaline phosphatase [U/L]                               | numeric | laboratory 2008               | hepatic / nephritic |
| p41ldh         | 230-530         | Lactate dehydrogenase (LDH) [U/L]                        | numeric | laboratory 2008               | general             |
| p42fe          | 40-145          | Iron (FE) [ $\mu$ g/dL]                                  | numeric | laboratory 2008               | minerals            |
| p43tfr         | 200-360         | Transferrin [mg/dL]                                      | numeric | laboratory 2008               | general             |
| p44pcrh        | <9              | High-sensitivity C-reactive protein (hs-CRP) [mg/L]      | numeric | laboratory 2008               | cardiac             |
| IGF1           | 50-300          | Insulin like growth factor 1 (IGF1) [ng/mL]              | numeric | laboratory 2008               | growth              |
| E2             | 0-200           | 17 $\beta$ -estradiol (E2) [pmol/L]                      | numeric | laboratory 2008               | hormones            |
| Dheas          | 0-200           | Dehydroepiandrosterone sulfate (DHEA-S) [ $\mu$ g/dL]    | numeric | laboratory 2008               | homones             |
| Dhea           | 0-10            | Dehydroepiandrosterone (DHEA) [ng/mL]                    | numeric | laboratory 2008               | homones             |
| HDL            | 0-200           | High-density lipoprotein (HDL) [mg/dL]                   | numeric | laboratory 2008               | fats                |
| LDL            | 0-200           | Low-density lipoprotein (LDL) [mg/dL]                    | numeric | laboratory 2008               | fats                |
| INSULINA       | 0-2000          | Insulin [U/mL]                                           | numeric | laboratory 2008               | sugars              |
| ADMA           | 50-150          | Asymmetric dimethylarginine (ADMA) [ $\mu$ mol/L]        | numeric | laboratory 2008               | proteins            |
| TESTOTOTAL     | 0-1000          | Total testosterone [ng/dL]                               | numeric | laboratory 2008               | homones             |
| TESTOLIBRE     | 0-10            | Free testosterone [ng/dL]                                | numeric | laboratory 2008               | homones             |

**Table A.4:** Blood related features from the data set.

| Attribute name | Values expected | Description                                                                                       | Type        | How and when was it recorded?          |
|----------------|-----------------|---------------------------------------------------------------------------------------------------|-------------|----------------------------------------|
| k1             | 111,222,333     | WHO activity 6: Any difficulty washing face and arms?                                             | categorical | questionnaire answered by patient 2008 |
| k2             | 111,222,333     | WHO activity 8: Any difficulty dressing and undressing?                                           | categorical | questionnaire answered by patient 2008 |
| k3             | 111,222,333     | WHO activity 11: Any difficulty using the toilet?                                                 | categorical | questionnaire answered by patient 2008 |
| k4             | 111,222,333     | WHO activity 12: Any difficulty getting in and out of bed?                                        | categorical | questionnaire answered by patient 2008 |
| k5             | 111,222,333     | WHO activity 19: Any difficulty controlling urination and bowel movements?                        | categorical | questionnaire answered by patient 2008 |
| k6             | 111,222,333     | WHO activity 9: Any difficulty eating (e.g.,holding a fork, cutting food, drinking from a glass)? | categorical | questionnaire answered by patient 2008 |
| katz2008       | 0-6             | Number of ADL abilities                                                                           | numeric     | calculated by hospital 2008            |
| k1_2013        | 1,2,3           | WHO activity 6: Any difficulty washing face and arms?                                             | categorical | questionnaire answered by patient 2013 |
| k2_2013        | 1,2,3           | WHO activity 8: Any difficulty dressing and undressing?                                           | categorical | questionnaire answered by patient 2013 |
| k3_2013        | 1,2,3           | WHO activity 11: Any difficulty using the toilet?                                                 | categorical | questionnaire answered by patient 2013 |
| k4_2013        | 1,2,3           | WHO activity 12: Any difficulty getting in and out of bed?                                        | categorical | questionnaire answered by patient 2013 |
| k5_2013        | 1,2,3           | WHO activity 19: Any difficulty controlling urination and bowel movements?                        | categorical | questionnaire answered by patient 2013 |
| k6_2013        | 1,2,3           | WHO activity 9: Any difficulty eating (e.g.,holding a fork, cutting food, drinking from a glass)? | categorical | questionnaire answered by patient 2013 |
| katz2013       | 0-6             | Number of ADL abilities                                                                           | categorical | calculated by hospital 2013            |

**Table A.5:** Activities of Daily Living questionnaire (*ADL*) related features from the data set.

| Attribute name | Values expected     | Description                                                                                 | Type        | How and when was it recorded?          |
|----------------|---------------------|---------------------------------------------------------------------------------------------|-------------|----------------------------------------|
| lw1            | 111,222,333,444     | WHO activity 20: Any difficulty using the telephone?                                        | categorical | questionnaire answered by patient 2008 |
| lw2            | 111,222,333,444     | WHO activity 5: Any difficulty shopping daily for basic necessities?                        | categorical | questionnaire answered by patient 2008 |
| lw3            | 111,222,333,444     | WHO activity 10: Any difficulty cooking a simple meal?                                      | categorical | questionnaire answered by patient 2008 |
| lw4            | 111,222,333,444,555 | WHO activity 13: Any difficulty doing light housework (e.g., doing dishes, light cleaning)? | categorical | questionnaire answered by patient 2008 |
| lw5            | 111,222,333         | WHO activity 14: Any difficulty doing heavy housework (e.g., washing windows, floor)?       | categorical | questionnaire answered by patient 2008 |
| lw6            | 111,222,333,444,555 | WHO activity 22: Any difficulty using public transportation?                                | categorical | questionnaire answered by patient 2008 |
| lw7            | 111,222,333         | WHO activity 23: Any difficulty taking medications correctly?                               | categorical | questionnaire answered by patient 2008 |
| lw8            | 111,222,333         | WHO activity 24: Any difficulty managing home finances?                                     | categorical | questionnaire answered by patient 2008 |
| lawton2008     | 0-8                 | Number of IADL abilities (0-8)                                                              | numeric     | calculated by hospital 2008            |
| lw1_2013       | 1,2,3,4             | WHO activity 20: Any difficulty using the telephone?                                        | categorical | questionnaire answered by patient 2013 |
| lw2_2013       | 1,2,3,4             | WHO activity 5: Any difficulty shopping daily for basic necessities?                        | categorical | questionnaire answered by patient 2013 |
| lw3_2013       | 1,2,3,4             | WHO activity 10: Any difficulty cooking a simple meal?                                      | categorical | questionnaire answered by patient 2013 |
| lw4_2013       | 1,2,3,4,5           | WHO activity 13: Any difficulty doing light housework (e.g., doing dishes, light cleaning)? | categorical | questionnaire answered by patient 2013 |
| lw5_2013       | 1,2,3               | WHO activity 14: Any difficulty doing heavy housework (e.g., washing windows, floor)?       | categorical | questionnaire answered by patient 2013 |
| lw6_2013       | 1,2,3,4,5           | WHO activity 22: Any difficulty using public transportation?                                | categorical | questionnaire answered by patient 2013 |
| lw7_2013       | 1,2,3               | WHO activity 23: Any difficulty taking medications correctly?                               | categorical | questionnaire answered by patient 2013 |
| lw8_2013       | 1,2,3               | WHO activity 24: Any difficulty managing home finances?                                     | categorical | questionnaire answered by patient 2013 |
| lawton2013     | 0-8                 | Number of IADL abilities                                                                    | categorical | physician 2013                         |

**Table A.6:** Instrumental Activities of Daily Living (*IADL*) questionnaire related features from the data set

| Attribute name | Values expected | Description                                                          | Type        | How and when was it recorded?          |
|----------------|-----------------|----------------------------------------------------------------------|-------------|----------------------------------------|
| alch1          | 0-8             | How many drinks do you have?                                         | categorical | questionnaire answered by patient 2008 |
| alch1a1        | N+              | how many glasses of wine do you drink daily?                         | numeric     | questionnaire answered by patient 2008 |
| alch1a2        | N+              | how many glasses of beer do you drink daily?                         | numeric     | questionnaire answered by patient 2008 |
| alch1a3        | N+              | how many glasses of spirits do you drink daily?                      | numeric     | questionnaire answered by patient 2008 |
| alch1b         | 0-age           | For how many years?                                                  | numeric     | questionnaire answered by patient 2008 |
| alch2          | yes,no          | did you drink previously?                                            | binary      | questionnaire answered by patient 2008 |
| alch2a         | 1-5             | Kind of drinker                                                      | categorical | questionnaire answered by patient 2008 |
| alch2b         | 1-8             | Starting age                                                         | categorical | questionnaire answered by patient 2008 |
| alch2c         | 1-8             | Ending age                                                           | categorical | questionnaire answered by patient 2008 |
| tab1           | 1-4             | Have you smoked at least 100 cigarettes in your entire life?         | categorical | questionnaire answered by patient 2008 |
| tab1a          | 1-3             | If yes, Did you smoke cigarettes daily, occasionally, or not at all? | categorical | questionnaire answered by patient 2008 |
| tab1a1         | 1-3             | Do you smoke actually?                                               | categorical | questionnaire answered by patient 2008 |
| tab1a1a        | 1-8             | If not, How many time have you stopped smoking?                      | categorical | questionnaire answered by patient 2008 |
| tab1a3         | 0-age           | For how many years did you smoke?                                    | numeric     | questionnaire answered by patient 2008 |
| @1_year_smoker | yes, no         | smoker for at least one year                                         | binary      | physician 2008                         |
| current_smoker | yes, no         | current smoker                                                       | binary      | physician 2008                         |

**Table A.7:** Consumption related features from the data set.

| Attribute name | Values expected | Description                                                            | Type    | How and when was it recorded?          |
|----------------|-----------------|------------------------------------------------------------------------|---------|----------------------------------------|
| fuerza1a       | 0-60            | Muscle strength (upper) with dynamometer: hand grip dominant limb (kg) | numeric | physician 2008                         |
| peso1          | 30-200          | Weight (kg)                                                            | numeric | physician 2008                         |
| altura1        | 120-220         | Height (cm)                                                            | numeric | physician 2008                         |
| ppca           | 20-200          | Anthropometry: hip perimeter (cm)                                      | numeric | physician 2008                         |
| pasetotal      | 0-400+          | Physical activity scale for elderly score                              | numeric | questionnaire answered by patient 2008 |
| codigo01       | alive,death     | Dead at follow up?                                                     | binary  | physician 2008                         |

**Table A.8:** Physique related features from the data set.

| Attribute name | Values expected | Description                                                          | Type        | How and when was it recorded?          |
|----------------|-----------------|----------------------------------------------------------------------|-------------|----------------------------------------|
| ccv1           | yes,no          | Myocardial infarction / Heart attack (self reported)+E148            | binary      | questionnaire answered by patient 2008 |
| ccv2           | yes,no          | Congestive heart failure (self reported)                             | binary      | questionnaire answered by patient 2008 |
| ccv4           | yes,no          | Angina pectoris (self reported)                                      | binary      | questionnaire answered by patient 2008 |
| ccv6           | yes,no          | Hypertension (self-report,drugs,BP tests)                            | binary      | questionnaire answered by patient 2008 |
| ccv8           | yes,no          | Diabetes mellitus (self reported, drugs)                             | binary      | questionnaire answered by patient 2008 |
| cv1cv4         | yes,no          | Myocardial infarction / Heart attack (self reported)/angina pectoris | binary      | questionnaire answered by patient 2008 |
| charlsonindex  | 0-37            | Charlson co-morbidity index                                          | categorical | physician 2008                         |

**Table A.9:** Comorbidity related features from the data set.

| Attribute name                                            | Values expected | Description                                                                                                                                                                                                                                                                                                                                | Type        | How and when was it recorded?          |
|-----------------------------------------------------------|-----------------|--------------------------------------------------------------------------------------------------------------------------------------------------------------------------------------------------------------------------------------------------------------------------------------------------------------------------------------------|-------------|----------------------------------------|
| enpot1                                                    | 0,1,NaN         | What day of the week is this? (MMSE question)                                                                                                                                                                                                                                                                                              | categorical | questionnaire answered by patient 2008 |
| enpot2                                                    | 0,1,NaN         | What is today's date? (MMSE question)                                                                                                                                                                                                                                                                                                      | categorical | questionnaire answered by patient 2008 |
| enpot3                                                    | 0,1,NaN         | What month is this? (MMSE question)                                                                                                                                                                                                                                                                                                        | categorical | questionnaire answered by patient 2008 |
| enpot4                                                    | 0,1,NaN         | What year is this? (MMSE question)                                                                                                                                                                                                                                                                                                         | categorical | questionnaire answered by patient 2008 |
| enpot6                                                    | 0,1,NaN         | Which season is this? (MMSE question)                                                                                                                                                                                                                                                                                                      | categorical | questionnaire answered by patient 2008 |
| enpol1                                                    | 0,1,NaN         | IN HOME: What is the street address of this house? // IN FACILITY: What is the name of this building? (MMSE question)                                                                                                                                                                                                                      | categorical | questionnaire answered by patient 2008 |
| enpol2                                                    | 0,1,NaN         | IN HOME: What room are we in? // IN FACILITY: What floor are we on? (MMSE question)                                                                                                                                                                                                                                                        | categorical | questionnaire answered by patient 2008 |
| enpol3                                                    | 0,1,NaN         | What city/town are we in? (MMSE question)                                                                                                                                                                                                                                                                                                  | categorical | questionnaire answered by patient 2008 |
| enpol4                                                    | 0,1,NaN         | What province are we in? (MMSE question)                                                                                                                                                                                                                                                                                                   | categorical | questionnaire answered by patient 2008 |
| enpol5                                                    | 0,1,NaN         | What county are we in? (MMSE question)                                                                                                                                                                                                                                                                                                     | categorical | questionnaire answered by patient 2008 |
| enpmem1a                                                  | 1,2,3,4,NaN     | SAY: I am going to name three objects. When I am finished, I want you to repeat them. Remember what they are because I am going to ask you to name them again in a few minutes. // Say the following words slowly at 1-second intervals - peseta (coin in spanish), caballo (horse in spanish), manzana (apple in spanish) (MMSE question) | categorical | questionnaire answered by patient 2008 |
| enpat2                                                    | 1,2,3,4,5,6,NaN | Spell the word MUNDO (world in spanish). Now spell it backwards.                                                                                                                                                                                                                                                                           | categorical | questionnaire answered by patient 2008 |
| enpat1                                                    | 1,2,3,4,5,6,NaN | Count backwards by 7 starting from 100                                                                                                                                                                                                                                                                                                     | categorical | questionnaire answered by patient 2008 |
| enpmem2                                                   | 1,2,3,4,NaN     | Now what were the three objects I asked you to remember?                                                                                                                                                                                                                                                                                   | categorical | questionnaire answered by patient 2008 |
| enpleng1                                                  | 1,2,3,NaN       | Show a wristcatch and a pencil. What are these called?                                                                                                                                                                                                                                                                                     | categorical | questionnaire answered by patient 2008 |
| enpleng2                                                  | 1,2,NaN         | SAY: I would like you to repeat this phrase after me: Ni si, ni no, ni pero. (No ifs, ands or buts. In spanish)                                                                                                                                                                                                                            | categorical | questionnaire answered by patient 2008 |
| enpleng4                                                  | 1,2,NaN         | SAY: Read the words on the page and then do what it says. Then hand the person the sheet with "Cierre los ojos" (close your eyes in spanish) on it. If the subject read and does not close their eyes, repeat yp to three times. Score only if subject closes eyes.                                                                        | categorical | questionnaire answered by patient 2008 |
| enpprx1                                                   | 1,2,NaN         | Hand the person a pencil and paper. SAY: write any complete sentence on that piece of paper. (Note: The sentence must make sense. Ignore spelling errors)                                                                                                                                                                                  | categorical | questionnaire answered by patient 2008 |
| enpprx2                                                   | 1,2,NaN         | Place design, eraser and pencil in front of the person. SAY: copy this design please. // Allow multiple tries. Wait until person is finished and hands it back. Score only for correctly copied diagram with a 4-sided figure between two 5-sided figures.                                                                                 | categorical | questionnaire answered by patient 2008 |
| enpleng3                                                  | 1,2,3,4,NaN     | Ask the person if he is right or left handed. Take a piece of paper and hold it up in front of the person. SAY: Take this paper in your right/left hand (whichever is non-dominant), fold the paper in half once with both hands and put the paper down on the floor. Score 1 point for each instruction executed correctly.               | categorical | questionnaire answered by patient 2008 |
| mmse2009                                                  | 0-30            | MMSE raw score                                                                                                                                                                                                                                                                                                                             | numeric     | calculated by hospital 2008            |
| cognitive<br>_impairment<br>_mmse<br>_educative<br>_level | yes,no          | Has the patient a cognitive impairment?                                                                                                                                                                                                                                                                                                    | binary      | determined by physician 2008           |

**Table A.10:** Mini-Mental-State-Examination (*MMSE*) related features from the data set.



| Attribute name | Values expected  | Description                                                                                                                                                                      | Type        | How and when was it recorded?          |
|----------------|------------------|----------------------------------------------------------------------------------------------------------------------------------------------------------------------------------|-------------|----------------------------------------|
| cq8            | yes, no, 88 = NA | Leukemia or Polycythemia                                                                                                                                                         | categorical | physician 2008                         |
| cq9            | yes, no, 88 = NA | Lymphoma                                                                                                                                                                         | categorical | physician 2008                         |
| cq10           | yes, no, 88 = NA | Cancer (except Leukemia, polycythemia and lymphoma)                                                                                                                              | categorical | physician 2008                         |
| cq6            | 1,2,3,4          | Did any doctor tell you that you had Alzheimer's disease, senile dementia or another dementia?                                                                                   | categorical | questionnaire answered by patient 2008 |
| cq6a           | 1-10             | What kind of dementia did your say doctor that you had?                                                                                                                          | categorical | questionnaire answered by patient 2008 |
| reum1          | 1,2,3,4          | Have you ever had any joint inflamed for more than 4 weeks in a row?                                                                                                             | categorical | questionnaire answered by patient 2008 |
| reum2          | 1,2,3,4          | Have you ever felt pain in any joint for more than 4 weeks in a row?                                                                                                             | categorical | questionnaire answered by patient 2008 |
| reum3          | 1,2,3,4          | Do you ever feel that you can't move or feel rigid for over half an hour during the morning?                                                                                     | categorical | questionnaire answered by patient 2008 |
| reum4          | 1,2,3,4          | Have you ever been told you have arthritis?                                                                                                                                      | categorical | questionnaire answered by patient 2008 |
| reum5          | 1-9              | Please select in the mannequin the joints in which you have had or have now inflammation for more than 4 weeks in a row (note the location of the affected joints). SHOW CARD 2. | categorical | questionnaire answered by patient 2008 |
| reum6          | 1,2,3,4          | Do you feel pain or have inflammation in any joint?                                                                                                                              | categorical | questionnaire answered by patient 2008 |
| reum6a         | 1-9              | If yes, Please, show which joints. SHOW CARD 2:                                                                                                                                  | categorical | questionnaire answered by patient 2008 |
| reum7          | 1-6              | Did any doctor tell you that you had arthritis or arthrosis in your..?                                                                                                           | categorical | questionnaire answered by patient 2008 |
| reum7a         | 1,2,3,4          | if yes (1, 2 or 3)The doctor said that you had it after a hip or knee radiography, or both?                                                                                      | categorical | questionnaire answered by patient 2008 |
| epoc1          | 1,2,3,4          | Did any doctor tell you that you had a chronic obstructive pulmonary disease: emphysema or chronic bronchitis?                                                                   | categorical | questionnaire answered by patient 2008 |
| epoc2          | 1,2,3,4          | Did any doctor say tell that you had asthma?                                                                                                                                     | categorical | questionnaire answered by patient 2008 |
| epoc3          | 1,2,3,4          | Did any doctor tell you that you had any lung disease?                                                                                                                           | categorical | questionnaire answered by patient 2008 |
| epoc4          | 1,2,3,4          | Did any doctor tell you that you had had a pneumonia or bronchopneumonia?                                                                                                        | categorical | questionnaire answered by patient 2008 |
| epoc5          | 1,2,3,4          | Did any doctor tell you that you had had an acute bronchitis?                                                                                                                    | categorical | questionnaire answered by patient 2008 |
| epoc6          | 1,2,3,4          | Have you ever been operated of your lung?                                                                                                                                        | categorical | questionnaire answered by patient 2008 |
| epoc7          | 1,2,3,4          | Do you have any other lung disease?                                                                                                                                              | categorical | questionnaire answered by patient 2008 |

**Table A.11:** Disease related features from the data set

| Attribute name | Values expected | Description                                      | Type   | How and when was it recorded?          |
|----------------|-----------------|--------------------------------------------------|--------|----------------------------------------|
| em1            | yes,no          | Are you able to walk at home?                    | binary | questionnaire answered by patient 2008 |
| em1a           | yes,no          | If answered YES; Do you get tired when doing it? | binary | questionnaire answered by patient 2008 |
| em1b           | yes,no          | If answered YES; Do you need help when doing it? | binary | questionnaire answered by patient 2008 |
| em2            | yes,no          | Are you able to go out from home?                | binary | questionnaire answered by patient 2008 |
| em2a           | yes,no          | If answered YES; Do you get tired when doing it? | binary | questionnaire answered by patient 2008 |
| em2b           | yes,no          | If answered YES; Do you need help when doing it? | binary | questionnaire answered by patient 2008 |
| em3            | yes,no          | Are you able to climb stairs?                    | binary | questionnaire answered by patient 2008 |
| em3a           | yes,no          | If answered YES; Do you get tired when doing it? | binary | questionnaire answered by patient 2008 |
| em3b           | yes,no          | If answered YES; Do you need help when doing it? | binary | questionnaire answered by patient 2008 |
| em4            | yes,no          | Are you able to walk outside (nice weather)?     | binary | questionnaire answered by patient 2008 |
| em4a           | yes,no          | If answered YES; Do you get tired when doing it? | binary | questionnaire answered by patient 2008 |
| em4b           | yes,no          | If answered YES; Do you need help when doing it? | binary | questionnaire answered by patient 2008 |
| em5            | yes,no          | Are you able to walk outside (bad weather)?      | binary | questionnaire answered by patient 2008 |
| em5a           | yes,no          | If answered YES; Do you get tired when doing it? | binary | questionnaire answered by patient 2008 |
| em5b           | yes,no          | If answered YES; Do you need help when doing it? | binary | questionnaire answered by patient 2008 |

**Table A.12:** Mobility Scale (*MS*) related features from the data set.

| Attribute name     | Values expected  | Description        | Type                            | How and when was it recorded?         |
|--------------------|------------------|--------------------|---------------------------------|---------------------------------------|
| hi1                | 7-8 digit number | ETES ID            | numeric                         | assigned and recorded by the hospital |
| frailomic_code     | "TO" + hi1       | FRAILOMIC ID       | 2 constant characters + numeric | assigned and recorded by the hospital |
| Parma_serum_code   | Code             | Parma Serum code   | text                            | assigned and recorded by the hospital |
| Parma_Edta_code    | Code             | Parma EDTA Code    | text                            | assigned and recorded by the hospital |
| Jena_Edta_code     | Code             | Jena EDTA Code     | text                            | assigned and recorded by the hospital |
| Evercyte_Edta_code | Code             | Evercyte EDTA Code | text                            | assigned and recorded by the hospital |
| Cardiff_serum_code | Code             | Cardiff Serum Code | text                            | assigned and recorded by the hospital |
| Cardiff_Edta_code  | Code             | Cardiff EDTA Code  | text                            | assigned and recorded by the hospital |
| EV_Edta_code       | Code             | EV EDTA Code       | text                            | assigned and recorded by the hospital |

**Table A.13:** Codes and IDs of the hospital which appear in the data set.

| Attribute name       | Values expected | Description                                           | Type        | How and when was it recorded? |
|----------------------|-----------------|-------------------------------------------------------|-------------|-------------------------------|
| hi8                  | 0-130           | Age in years                                          | numeric     | physician 2008                |
| hi11                 | male, female    | Gender                                                | binary      | physician 2008                |
| individualincome     | 1-12            | Income of the individual                              | categorical | physician 2008                |
| householdincome      | 1-15            | Income of the household in which the individual lives | categorical | physician 2008                |
| numpersonsfamilyunit | 1-10            | Number of persons in the family                       | categorical | physician 2008                |

**Table A.14:** Features related to demographic properties of the patients.

| Attribute name | Values expected | Description                    | Type    | How and when was it recorded? |
|----------------|-----------------|--------------------------------|---------|-------------------------------|
| ekg1           | 40-200          | EKG: Heart rate (beats/minute) | numeric | physician 2008                |
| tadd           | 40-140          | Pressure arterial. Diastolic   | numeric | physician 2008                |
| tads           | 80-260          | Pressure arterial. Systolic    | numeric | physician 2008                |

**Table A.15:** Features related to cardiac properties of the patients.

| Attribute name | Values expected | Description                                                                                                                           | Type        | How and when was it recorded?          |
|----------------|-----------------|---------------------------------------------------------------------------------------------------------------------------------------|-------------|----------------------------------------|
| ps1            | 1-6             | How would you evaluate your current health? How do you feel now?                                                                      | categorical | questionnaire answered by patient 2008 |
| ps2            | 1-6             | How is your health compared to 1 yr ago?                                                                                              | categorical | questionnaire answered by patient 2008 |
| ps3            | 1-6             | How would you judge your health compared to other people of your same age?                                                            | categorical | questionnaire answered by patient 2008 |
| ps4            | 1-6             | Are you happy in general?                                                                                                             | categorical | questionnaire answered by patient 2008 |
| ps5            | 1-6             | If you are thinking about you life till now, how satisfied are you?                                                                   | categorical | questionnaire answered by patient 2008 |
| ps6            | 1-6             | Are you feeling incapable of tackling problems in your life?                                                                          | categorical | questionnaire answered by patient 2008 |
| ps7            | 1-6             | Are you feel capable of tackling every task you would like to?                                                                        | categorical | questionnaire answered by patient 2008 |
| ps8            | 1-5             | During the last week, did you feel physical pain?                                                                                     | categorical | questionnaire answered by patient 2008 |
| ps9            | 1-5             | During the last month, how many times did you visit the general practitioner because of being sick?                                   | categorical | questionnaire answered by patient 2008 |
| ps10           | 1-6             | When was the last time that you visited a medical doctor or another medical professional in order to speak about your health?         | categorical | questionnaire answered by patient 2008 |
| ps11           | 1-7             | Think about the most painful/woebegone event which has happened in the last ten years. How much time did you need to recover from it? | categorical | questionnaire answered by patient 2008 |
| ps12           | 1-5             | During the last 12 months, how many times have you been hospitalized (over night)?                                                    | categorical | questionnaire answered by patient 2008 |
| ps13           | 1-7             | During the last 12 months, how many times did you visit the hospital because of an emergency (without spending the night)?            | categorical | questionnaire answered by patient 2008 |
| ps14           | 0,1             | During the last 12 months, where you patient in a rehabilitation center (with spending the night)?                                    | binary      | questionnaire answered by patient 2008 |
| ps14a          | 1-6             | During the last 12 months, how much time did you spend in an institution for physical therapy (with spending the night)?              | categorical | questionnaire answered by patient 2008 |

**Table A.16:** Features related to self reported health status of the patients.
